# Supplementary material
Source: PubMed Central journal article supplement (PMC10524976)
Supplement: NIHMS1904930-supplement-All_SUPP_FIGS.pdf [file NIHMS1904930-supplement-All_SUPP_FIGS.pdf]

Healthy CVID CVID GLILD

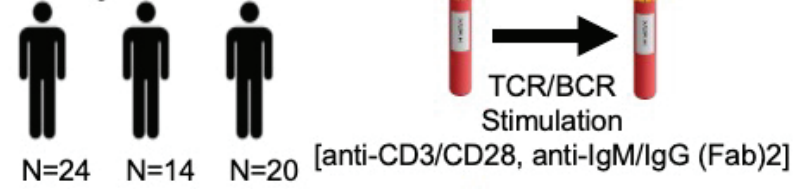

Phenotypic Markers

|        |       |      |       |       |
|--------|-------|------|-------|-------|
| CD3    | CD25  | ICOS | CD38  | CD14  |
| CD4    | PD-1  | CD19 | CD27  | CD1c  |
| CD8    | CTLA4 | CD21 | CD56  | HLADR |
| CD45RA | CD57  | IgD  | CD11c | CD11  |
| CXCR5  | CD7   | IgM  | CD16  | CD123 |

Signaling Markers

|            |          |            |
|------------|----------|------------|
| pCD3ζ      | pPLCγ1/2 | pS6        |
| pZAP70/SYK | pAKT     | pCREB      |
| pSLP76     | pERK     | p4EBP1     |
| pBTK/ITK   | pp90RSK  | Total IκBα |

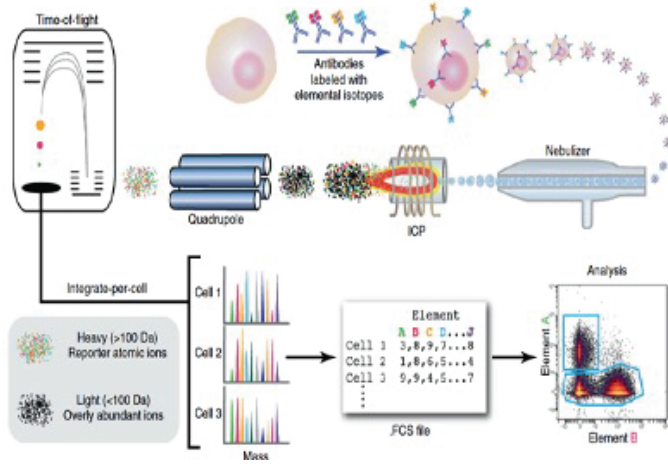

Supplemental Figure 1

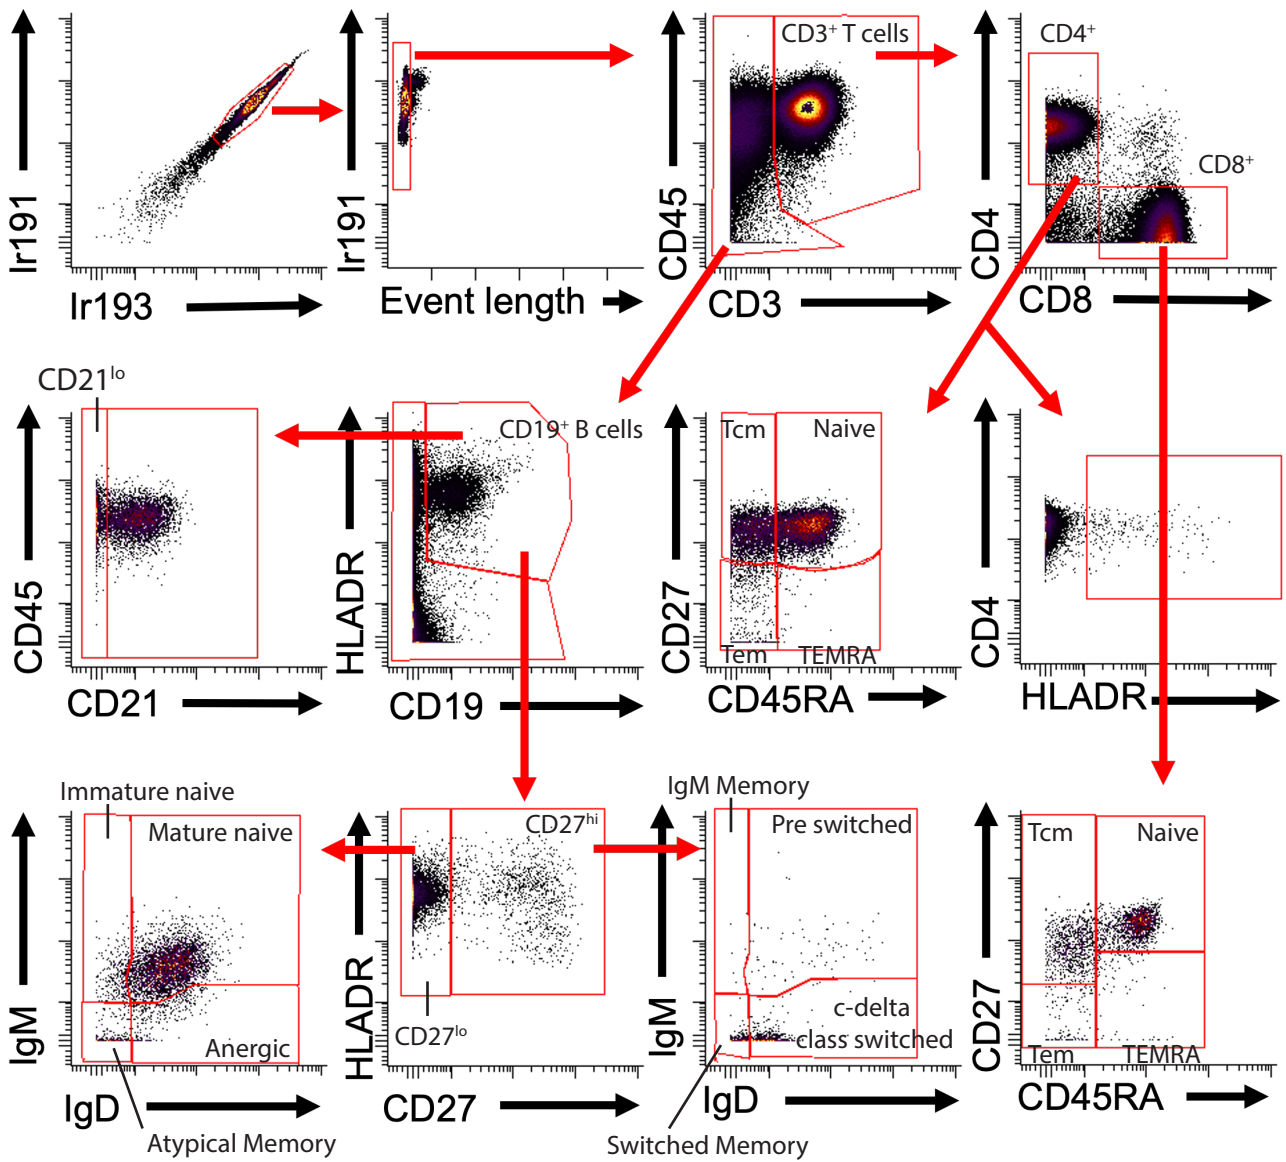

Supplemental Figure 2  
 Gating strategy for CD19<sup>+</sup> B cell, CD4<sup>+</sup> T cell, and CD8<sup>+</sup> T cell populations described in Figures 2-4.

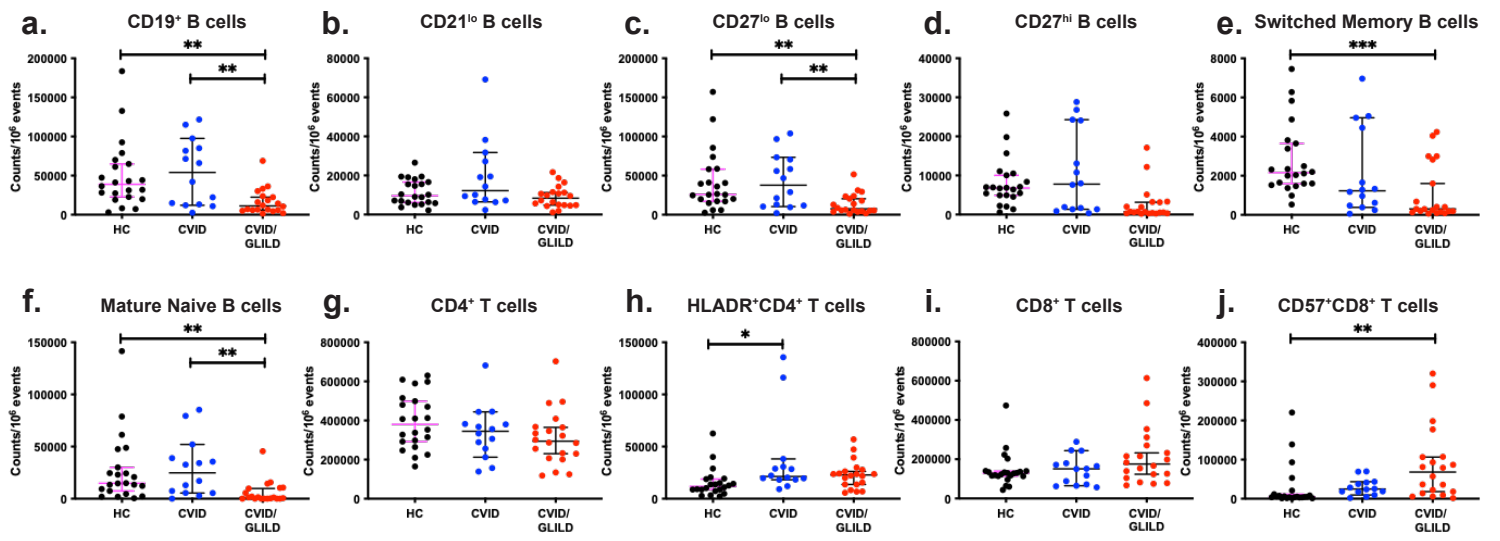

Supplemental Figure 3

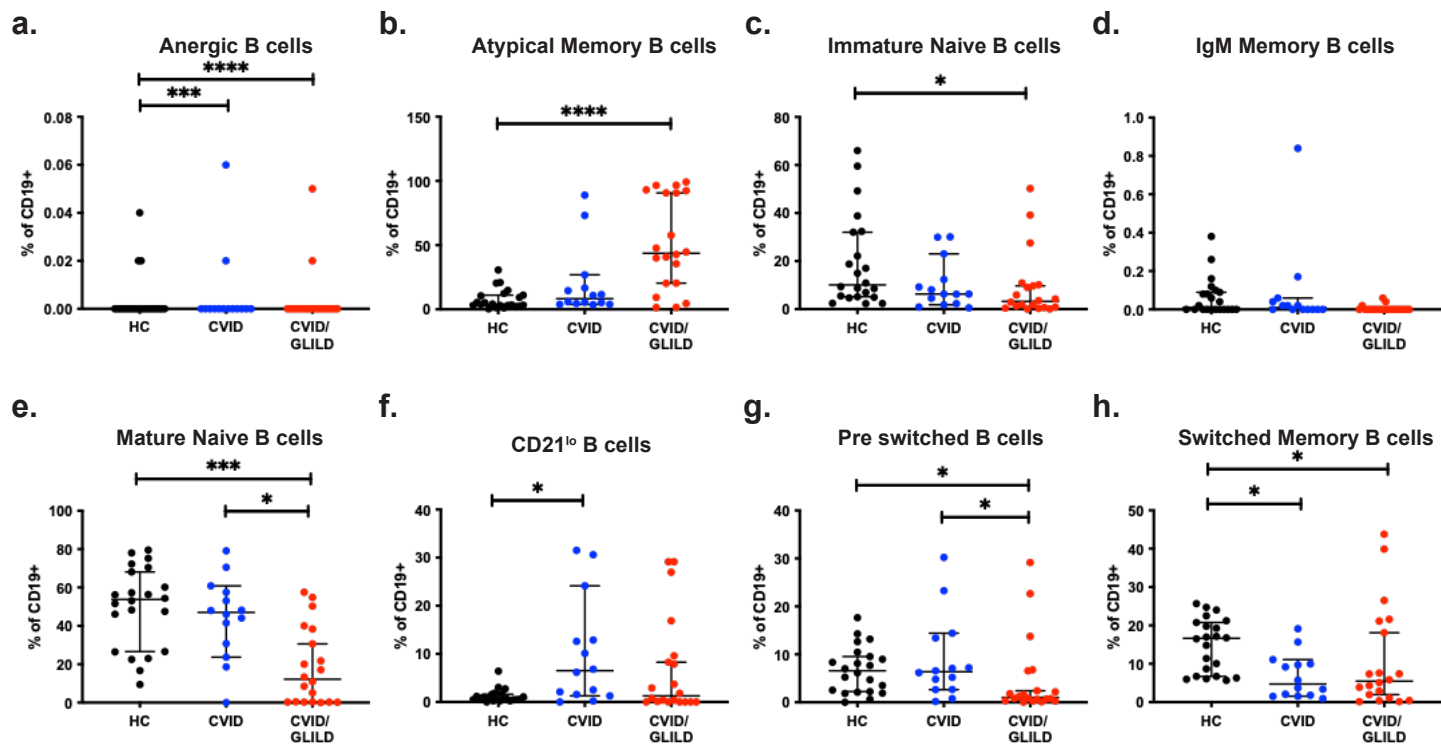

Supplemental Figure 4  
 Frequency distribution of Phenograph-derived population clusters of CD19<sup>+</sup> cellular events from Fig 2l.

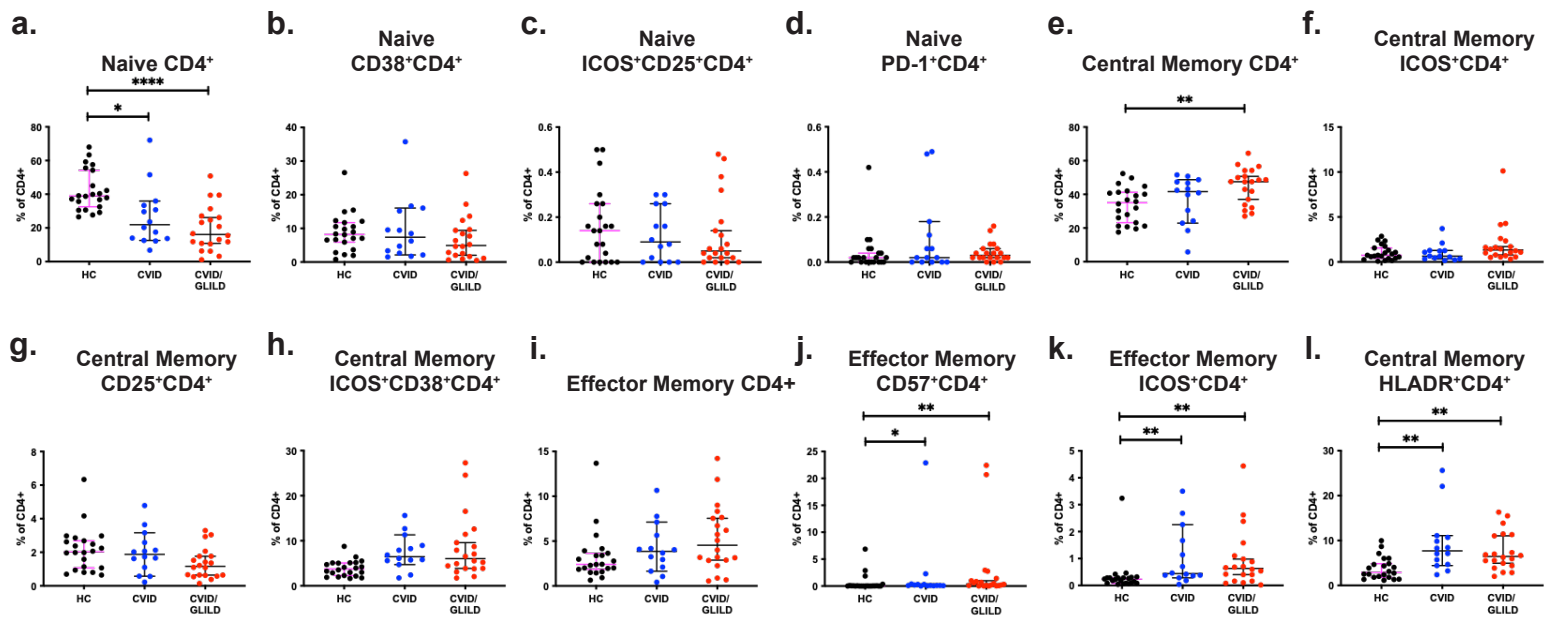

Supplemental Figure 5

Frequency distribution of Phenograph-derived population clusters of CD4<sup>+</sup> cellular events from Fig 3m.

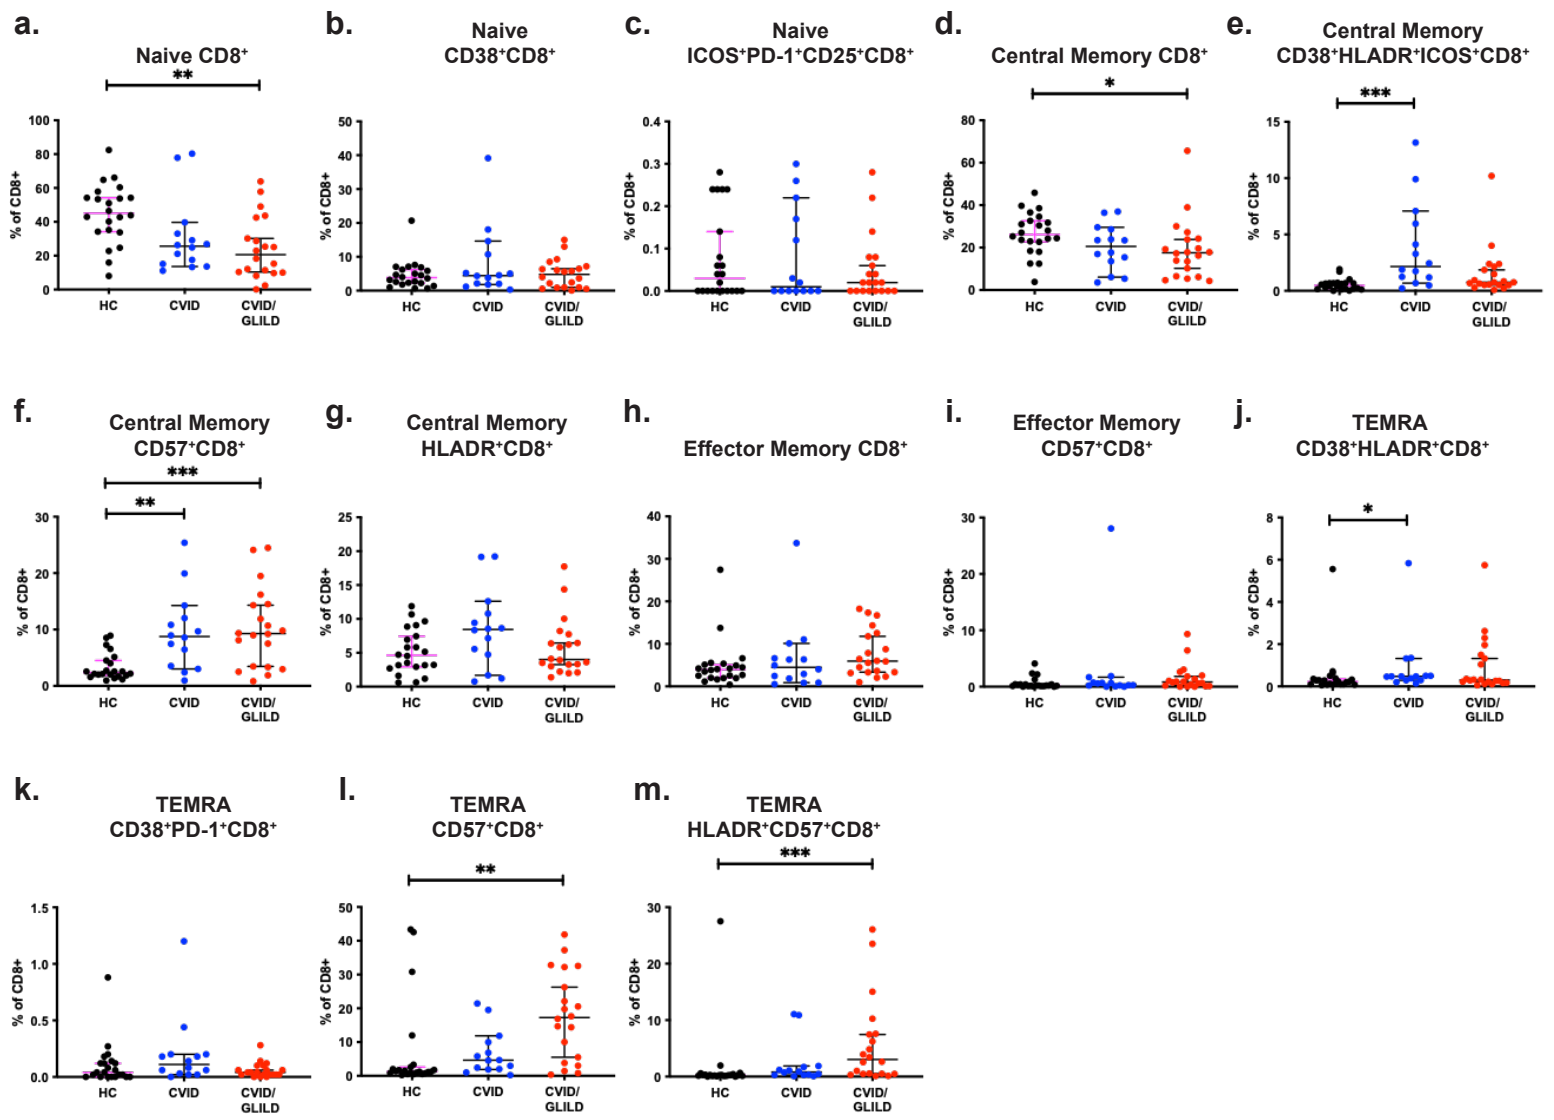

Supplemental Figure 6

Frequency distribution of Phenograph-derived population clusters of CD8<sup>+</sup> cellular events from Fig 4m.

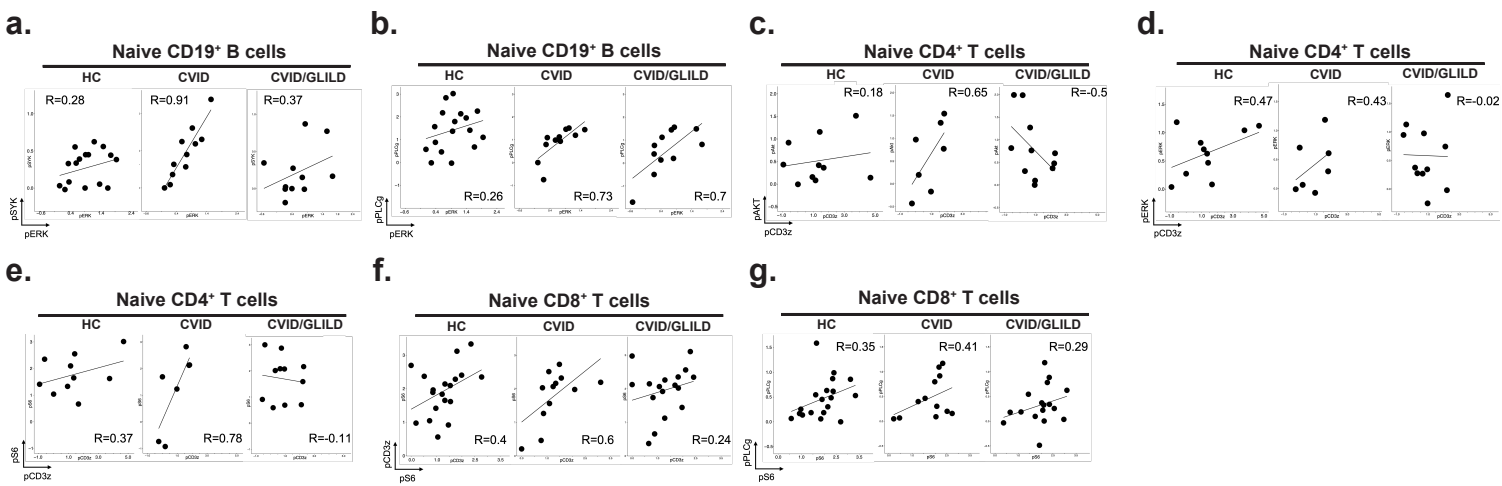

### Supplemental figure 7

Correlation scatterplots of the pairwise signaling molecules described in Figures 5-7 within their respective naive lymphocyte cellular population.
